# Supplementary material for: Endothelial progenitor cell-derived conditioned medium mitigates chronic cerebral ischemic injury through macrophage migration inhibitory factor-activated AKT pathway
Source: PubMed Central journal article supplement (PMC11566597; doi:10.1186/s13287-024-04015-5), 2024-11-14
Supplement: 13287_2024_4015_MOESM1_ESM.pdf [file 13287_2024_4015_MOESM1_ESM.pdf]

**Endothelial progenitor cell-derived conditioned medium mitigates chronic cerebral ischemic injury through macrophage migration inhibitory factor-activated AKT pathway**

Ya-Wen Cheng<sup>1</sup>, Ling-Yu Yang<sup>1</sup>, Yi-Tzu Chen<sup>1,2</sup>, Sheng-Che Chou<sup>1,2</sup>, Kuo-Wei Chen<sup>1,2</sup>, Yi-Hsing Chen<sup>1,2</sup>, Chuan-Rou Deng<sup>1</sup>, I-Chin Chen<sup>1</sup>, Wan-Ju Chou<sup>1,2</sup>, Chen-Chih Chang<sup>3</sup>, Yong-Ren Chen<sup>4,5</sup>, Hsiao-Lin Hwa<sup>6</sup>, Kuo-Chuan Wang<sup>1\*</sup>, and Meng-Fai Kuo<sup>1\*</sup>

Short title: **The role of MIF in chronic cerebral ischemia**

**Affiliations of authors:**

- 1 Division of Neurosurgery, Department of Surgery, National Taiwan University Hospital, Taipei, Taiwan
- 2 Graduate Institute of Clinical Medicine, National Taiwan University College of Medicine, Taipei, Taiwan
- 3 Department of Internal Medicine, National Taiwan University Hospital, College of Medicine, National Taiwan University, Taipei, Taiwan
- 4 Non-invasive Cancer Therapy Research Institute, Taipei, Taiwan
- 5 Adjunct Visiting Staff, Division of Neurosurgery, Department of Surgery, National Taiwan University Hospital, Taipei, Taiwan.
- 6 Department of Obstetrics and Gynecology, National Taiwan University Hospital, Taipei, Taiwan

\*Corresponding authors: Meng-Fai Kuo, [mfkenator@gmail.com](mailto:mfkenator@gmail.com) and Kuo-Chuan Wang, [wang081466@yahoo.com.tw](mailto:wang081466@yahoo.com.tw)

**Table S1 The human cytokine array results from conditioned medium of EPCs**

|    | Protein name | EPC-CM (<5%) | EPC-CM (5-30%) |    | Protein name | EPC-CM (<5%) | EPC-CM (5-30%) |     | Protein name          | EPC-CM (<5%) | EPC-CM (5-30%) |
|----|--------------|--------------|----------------|----|--------------|--------------|----------------|-----|-----------------------|--------------|----------------|
| 1  | PAI-1        | 3.65         | 18,637.18      | 47 | DKK-1        | 0.52         | 25.10          | 93  | Dkk                   | 6.80         | 0.93           |
| 2  | ICAM-2       | 71.66        | 10,729.11      | 48 | TREM-1       | 16.35        | 24.68          | 94  | EGF R                 | 0.00         | 0.91           |
| 3  | MIF          | 13.33        | 8,018.72       | 49 | Galectin-7   | 72.36        | 22.35          | 95  | MIP-1d                | 0.00         | 0.80           |
| 4  | IGFBP-4      | 641.66       | 2,295.08       | 50 | DR6          | 0.50         | 21.91          | 96  | EG-VEGF               | 3.81         | 0.78           |
| 5  | Angiostatin  | 1,887.46     | 1,914.17       | 51 | IL-2 Ra      | 34.12        | 20.28          | 97  | bFGF                  | 4.68         | 0.73           |
| 6  | TIMP-2       | 2.28         | 1,421.55       | 52 | I-TAC        | 22.97        | 20.22          | 98  | BTC                   | 5.22         | 0.67           |
| 7  | TIMP-1       | 0.00         | 1,317.97       | 53 | XEDAR        | 5.10         | 20.04          | 99  | VEGF                  | 0.00         | 0.65           |
| 8  | IL-13 R2     | 244.11       | 979.02         | 54 | Eotaxin      | 2.15         | 16.03          | 100 | TARC                  | 0.56         | 0.46           |
| 9  | VEGF R1      | 0.00         | 728.14         | 55 | TNF RII      | 3.05         | 14.28          | 101 | NRG1-b1               | 2.98         | 0.32           |
| 10 | TRAIL R3     | 4.04         | 539.34         | 56 | IL-15        | 32.48        | 13.22          | 102 | NT-4                  | 3.59         | 0.29           |
| 11 | IGFBP-2      | 3.58         | 533.83         | 57 | SCF R        | 0.00         | 12.54          | 103 | MIG                   | 0.31         | 0.24           |
| 12 | MCP-1        | 5.82         | 481.05         | 58 | Cathepsin S  | 5.82         | 10.53          | 104 | BDNF                  | 0.14         | 0.21           |
| 13 | HCC-1        | 1.50         | 325.24         | 59 | IL-6         | 4.19         | 10.42          | 105 | IL-12p70              | 0.32         | 0.18           |
| 14 | IL-17B       | 76.01        | 239.46         | 60 | Shh-N        | 0.00         | 9.75           | 106 | BLC                   | 0.04         | 0.14           |
| 15 | DAN          | 0.00         | 236.07         | 61 | LIMPII       | 0.30         | 9.41           | 107 | MIP-1b                | 0.93         | 0.13           |
| 16 | ICAM-1       | 0.32         | 177.37         | 62 | IL-17R       | 18.36        | 8.98           | 108 | MIP-3a                | 0.15         | 0.12           |
| 17 | GDF-15       | 0.20         | 156.55         | 63 | CEACAM-1     | 6.21         | 8.86           | 109 | IL-11                 | 7.30         | 0.11           |
| 18 | PIGF         | 0.04         | 134.45         | 64 | IL-6R        | 2.61         | 8.57           | 110 | GCP-2                 | 0.00         | 0.10           |
| 19 | IL-13 R1     | 303.09       | 124.85         | 65 | Endoglin     | 1.78         | 8.16           | 111 | MCP-3                 | 0.10         | 0.02           |
| 20 | PECAM-1      | 9.32         | 110.14         | 66 | TSLP         | 10.27        | 7.38           | 112 | IL-9                  | 17.60        | 0.00           |
| 21 | E-Selectin   | 0.04         | 78.41          | 67 | CXCL16       | 0.00         | 7.36           | 113 | IL-18 BP <sub>a</sub> | 2.73         | 0.00           |
| 22 | OPG          | 0.00         | 71.39          | 68 | ST2          | 6.17         | 7.14           | 114 | IL-31                 | 0.47         | 0.00           |
| 23 | gp130        | 0.00         | 71.21          | 69 | MICA         | 4.42         | 7.09           | 115 | LIGHT                 | 1.04         | 0.00           |
| 24 | Activin A    | 253.30       | 67.88          | 70 | ErbB3        | 1.37         | 4.65           | 116 | MCP-4                 | 0.16         | 0.00           |
| 25 | TGFb1        | 170.68       | 67.13          | 71 | Cripto-1     | 2.69         | 4.56           | 117 | MIP-3b                | 0.00         | 0.00           |
| 26 | E-Cadherin   | 34.58        | 66.18          | 72 | MCSF         | 0.24         | 4.51           | 118 | MSP                   | 13.89        | 0.00           |
| 27 | Follistatin  | 8.43         | 64.12          | 73 | L-Selectin   | 47.30        | 4.04           | 119 | PARC                  | 2.55         | 0.00           |
| 28 | LYVE-1       | 2.96         | 63.13          | 74 | IL-2 Rg      | 12.83        | 4.00           | 120 | SDF-1a                | 0.37         | 0.00           |
| 29 | IL-13        | 68.25        | 62.40          | 75 | BMP-4        | 4.35         | 3.63           | 121 | BMP-5                 | 307.48       | 0.00           |
| 30 | IL-8         | 2.09         | 61.65          | 76 | TGFb2        | 2.54         | 3.63           | 122 | GH                    | 3.71         | 0.00           |
| 31 | LAP(TGFb1)   | 3.06         | 57.85          | 77 | GRO          | 1.44         | 3.49           | 123 | VEGF-D                | 0.15         | 0.00           |
| 32 | VCAM-1       | 97.70        | 55.79          | 78 | IGFBP-1      | 5.00         | 3.47           | 124 | GM-CSF                | 2.70         | 0.00           |
| 33 | ANG-1        | 64.41        | 50.56          | 79 | ALCAM        | 0.00         | 2.64           | 125 | I-309                 | 1.66         | 0.00           |
| 34 | uPAR         | 36.23        | 47.88          | 80 | IL-1a        | 1.96         | 2.21           | 126 | IL-1b                 | 0.02         | 0.00           |
| 35 | TNF RI       | 2.88         | 45.80          | 81 | IL-1ra       | 0.00         | 2.16           | 127 | IL-7                  | 0.86         | 0.00           |
| 36 | TNFa         | 33.03        | 42.78          | 82 | HGF          | 0.00         | 1.75           | 128 | IL-10                 | 0.79         | 0.00           |
| 37 | PDGF-AB      | 27.77        | 40.14          | 83 | OPN          | 2.60         | 1.69           | 129 | IL-12p40              | 0.24         | 0.00           |
| 38 | Tie-2        | 28.63        | 39.03          | 84 | IL-17        | 0.00         | 1.68           | 130 | IL-16                 | 0.49         | 0.00           |
| 39 | AR           | 25.25        | 38.99          | 85 | RANTES       | 0.57         | 1.64           | 131 | TNFb                  | 16.04        | 0.00           |
| 40 | IL-2 Rb      | 52.72        | 37.19          | 86 | Lipocalin-2  | 1.97         | 1.52           | 132 | CD40L                 | 6.44         | 0.00           |
| 41 | Eotaxin-3    | 43.81        | 35.89          | 87 | IP-10        | 1.22         | 1.48           | 133 | ICAM-3                | 4.32         | 0.00           |
| 42 | NrCAM        | 12.12        | 35.22          | 88 | VEGF R2      | 0.00         | 1.46           | 134 | MICB                  | 17.11        | 0.00           |
| 43 | AgRP         | 38.27        | 31.93          | 89 | IFNg         | 0.00         | 1.34           | 135 | PDGF Rb               | 82.19        | 0.00           |
| 44 | Axl          | 0.00         | 30.30          | 90 | RAGE         | 2.31         | 1.22           | 136 | TIM-1                 | 12.39        | 0.00           |
| 45 | Angiogenin   | 32.72        | 25.96          | 91 | BCMA         | 6.29         | 1.08           | 137 | Trappin-2             | 2.63         | 0.00           |
| 46 | TRAIL R4     | 58.60        | 25.14          | 92 | IL-2         | 0.59         | 1.03           |     |                       |              |                |

The medium was collected from young EPCs and filtered by a Tangential Flow Filtration (TFF) membrane filter system unit with a 30 kDa cut-off (Millipore). The filtered and

concentrated medium was studied with the cytokine array by using Quantitative Cytokine Antibody Human Array 4000 (RayBiotech, Norcross, GA) following the manufacturer's protocol.

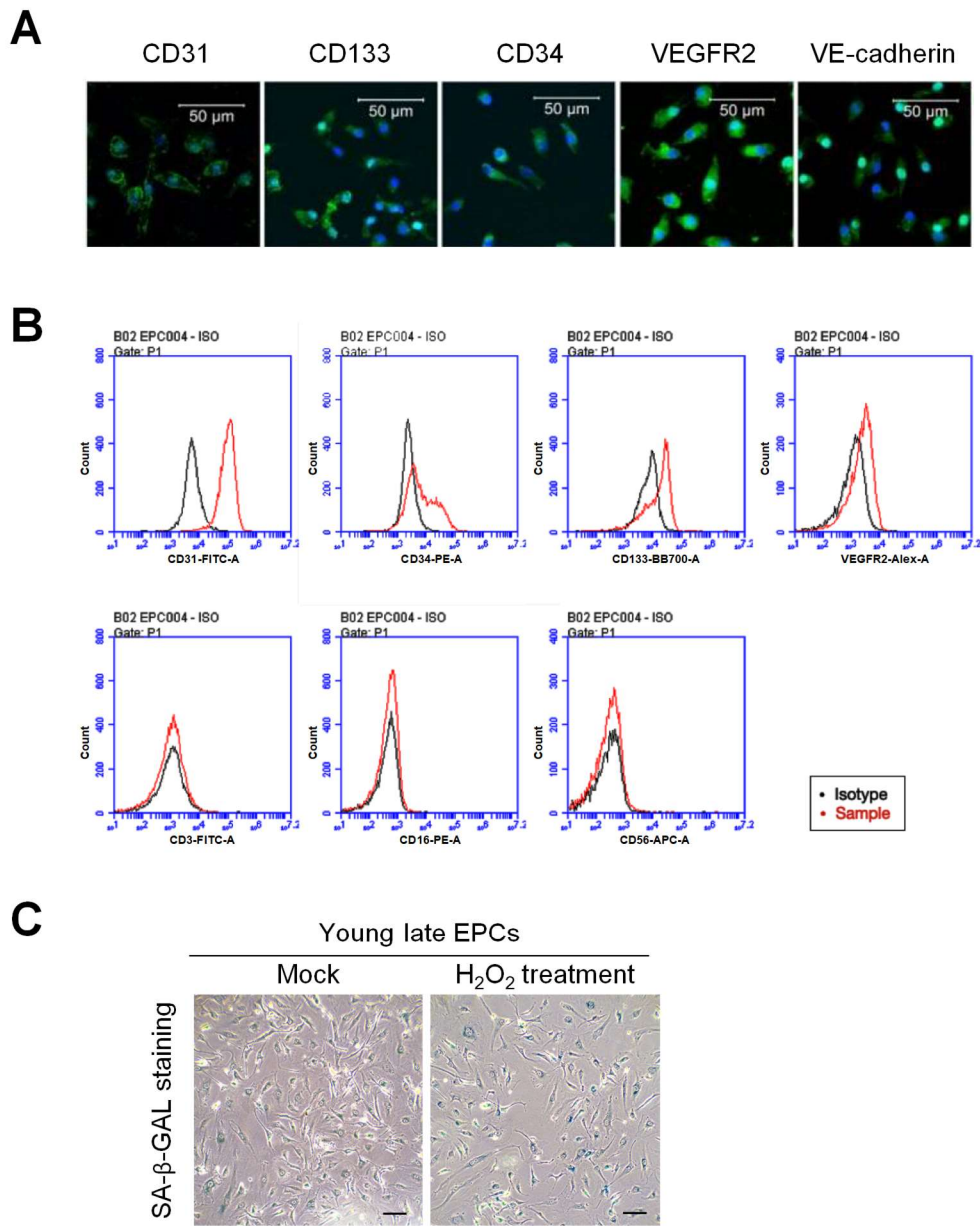

**Fig. S1 Characterization of the isolated EPCs.**

**A** Isolated EPCs express endothelial and hematopoietic stem cell markers, including CD133, CD31, CD34, VEGFR2, and VE-cadherin. Cells were counterstained with DAPI for the nuclei (blue). Scale bar = 50  $\mu$ m. **B** The critical markers of EPC (CD34, CD133, CD31, VEGFR2) of the isolated EPCs were examined by flow cytometry, and the isotype Ab was used as negative control. The analysis showed the cells present EPC specific

markers (CD31+, CD34+, CD133+, VEGFR2+), but negative of general lymphocyte cell marker, CD3, CD16, and CD56. **C** The senescent status of young EPCs was detected by SA- $\beta$ -GAL staining. The cells treated with H<sub>2</sub>O<sub>2</sub> (200  $\mu$ m) to induce cellular senescence were used as positive control. Scale bar = 100  $\mu$ m.

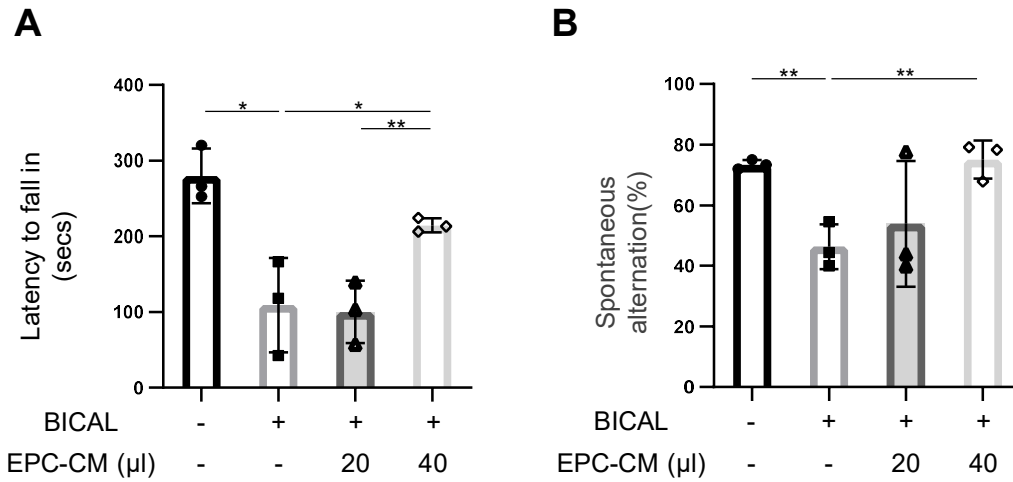

**Fig. S2 Effect of different dosages of EPC-CM on the motor and cognitive functions in BICAL rats.**

The dosage effect of EPC-CM treatment (20 or 40 μl) on the BICAL rats was evaluated. **A** The motor function was evaluated by rotarod test (n = 3). **B** The cognitive function was examined by Y-maze test (n = 3). The data was showed as the mean ± SD, and analyzed using Student *t* test. \*  $p < 0.05$ , \*\*  $p < 0.01$ .

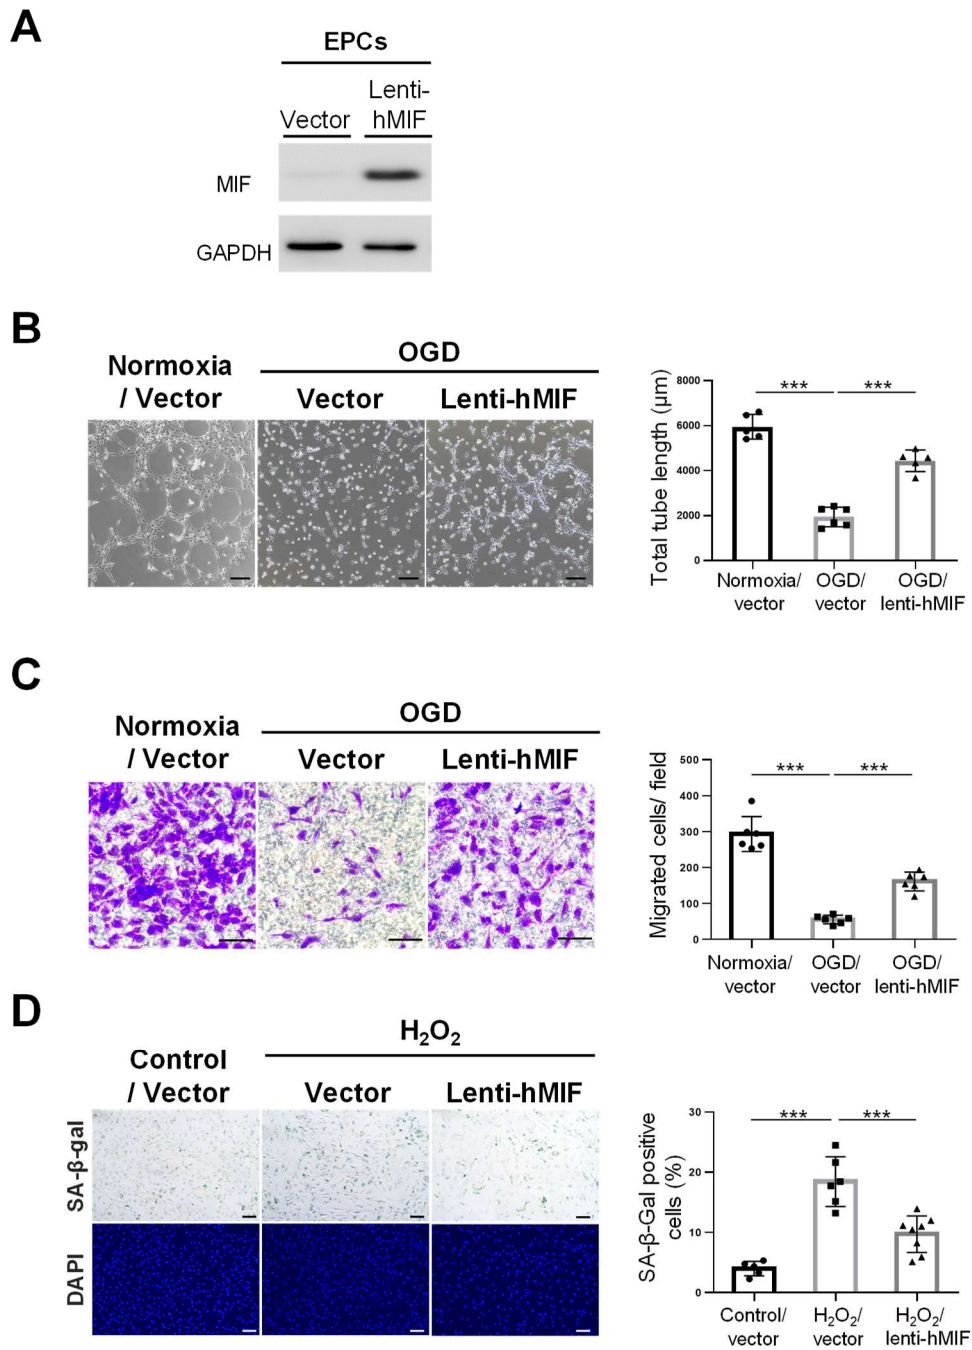

**Fig. S3 Transduction of EPCs with lenti-hMIF increases cells angiogenesis and anti-senescence *in vitro***

**A** Detection of the MIF protein expression of the lenti-hMIF virus transduced cells. EPCs were transduced with lenti-hMIF virus for three days. The MIF expression was analyzed

by Western blotting using anti-MIF Ab. The lenti-vector transduced cells were used as control. **B** Determination of the tube formation by Matrigel assay in EPCs expressing hMIF with OGD treatment (left panel). The average total tube length in 5 random fields was quantitatively analysis and showed as bar graph (right panel). Scale bar = 100  $\mu$ m. **C** Images of the EPCs passed through the transwell membrane stained by crystal violet staining (left panel). The migrated cell numbers were quantitatively analyzed by 6 fields randomly (right panel). Scale bar = 100  $\mu$ m. **D** Images of the SA- $\beta$ -gal staining in H<sub>2</sub>O<sub>2</sub> treated EPCs. Young EPCs (passage < 10) was transduced with lenti-hMIF or lenti-vector control for 3 days. The transduced EPCs were treated with H<sub>2</sub>O<sub>2</sub> to induce the senescence, then followed by 5% FBS EGM-2 incubation for three days (left panel). The senescence ratio was analyzed by the number of the SA- $\beta$ -gal positive cells, and normalized with DAPI staining. The data were compared with the H<sub>2</sub>O<sub>2</sub> group (right panel). Scale bar = 100  $\mu$ m. The data were showed as the mean  $\pm$  SD, and analyzed using One-way ANOVA. \*\*  $p < 0.01$ , \*\*\*  $p < 0.001$ .



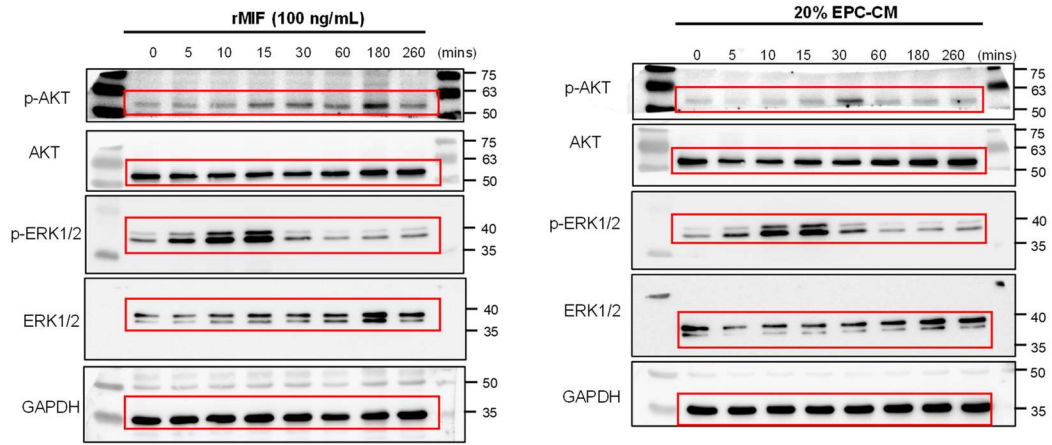

**Fig. S4 Corresponding full-length immunoblot of Figure 6A**

Western blot analysis of p-AKT, AKT, p-ERK1/2, ERK1/2, and GAPDH in Figure 6A. The red rectangles indicate the cropped immunoblot.

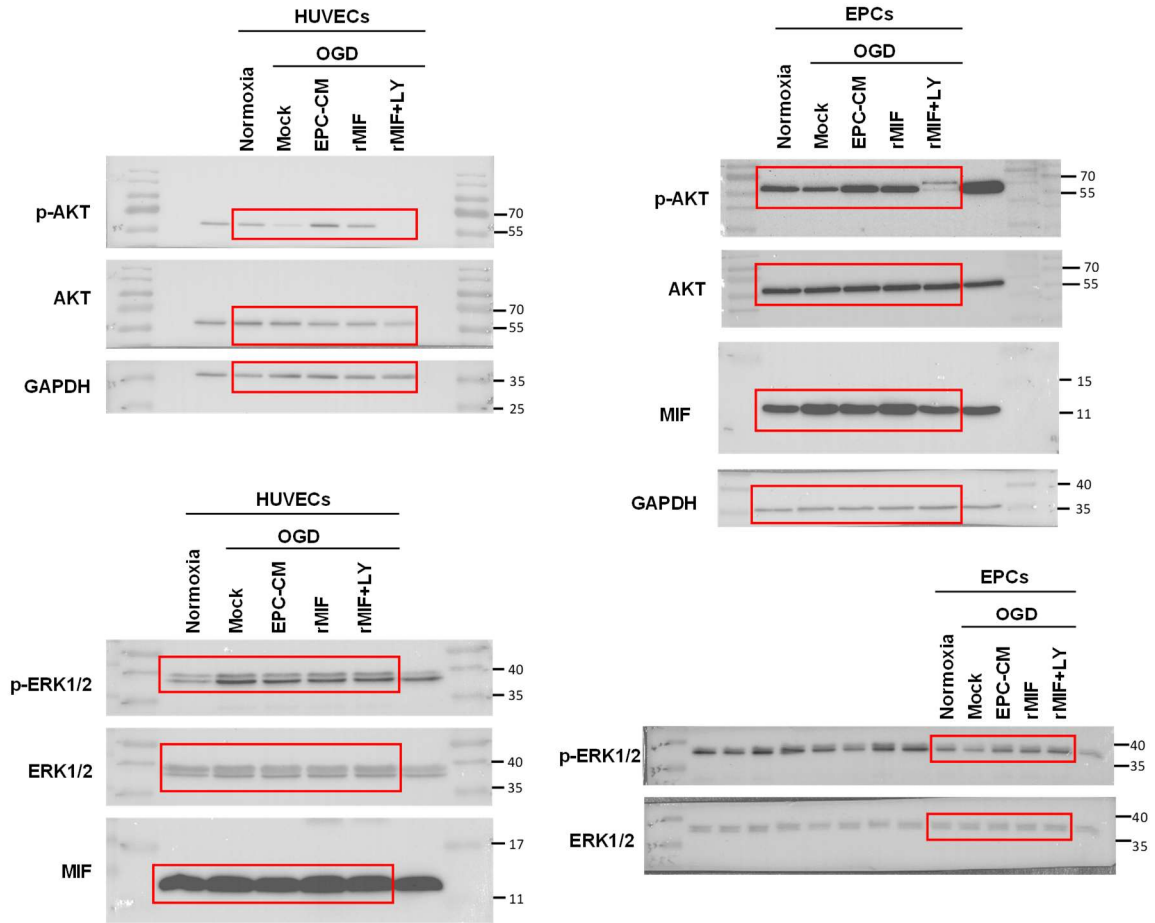

**Fig. S5 Corresponding full-length immunoblot of Figure 6B**

Western blot analysis of p-AKT, AKT, p-ERK1/2, ERK1/2, MIF, and GAPDH in Figure 6B. The red rectangles indicate the cropped immunoblot.
